# Supplementary material
Source: publisher figshare collection journal article supplement (https://acs.figshare.com/ndownloader/files/30810275)
Supplement: Supplementary file 1 [file 30810275]

## Supporting Information

### Meso/Microscopic Single Particle Analyses of Vapochromic Solid-State Crystallization in [Pt(CN)<sub>2</sub>(H<sub>2</sub>dc bpy)]

*Kazuyuki Ishii<sup>a,\*</sup>, Shunsuke Takanohashi<sup>a</sup>, Masanobu Karasawa<sup>a</sup>, Kyoko Enomoto<sup>a</sup>, Yasuhiro Shigeta<sup>b</sup>, and Masako Kato<sup>b,c,\*</sup>*

<sup>a</sup>Institute of Industrial Science, The University of Tokyo, 4-6-1 Komaba Meguro-ku, Tokyo, 153-8505 Japan.

<sup>b</sup>Department of Chemistry, Faculty of Science, Hokkaido University, Kita10, Nishi 8, Sapporo 060-0810, Japan.

<sup>c</sup>Department of Applied Chemistry for Environment, School of Biological and Environmental Sciences, Kwansei Gakuin University, 2-1 Gakuin, Sanda, Hyogo 669-1337 Japan.

| Contents                                     | Figure number | Page |
|----------------------------------------------|---------------|------|
| Experimental setup for vapochromic behaviors | Figure S1     | S2   |
|                                              | Figure S2     | S3   |
| Phosphorescence microscopy images            | Figure S3     | S4   |
|                                              | Figure S4     | S5   |

### Experimental setup for vapochromic behaviors

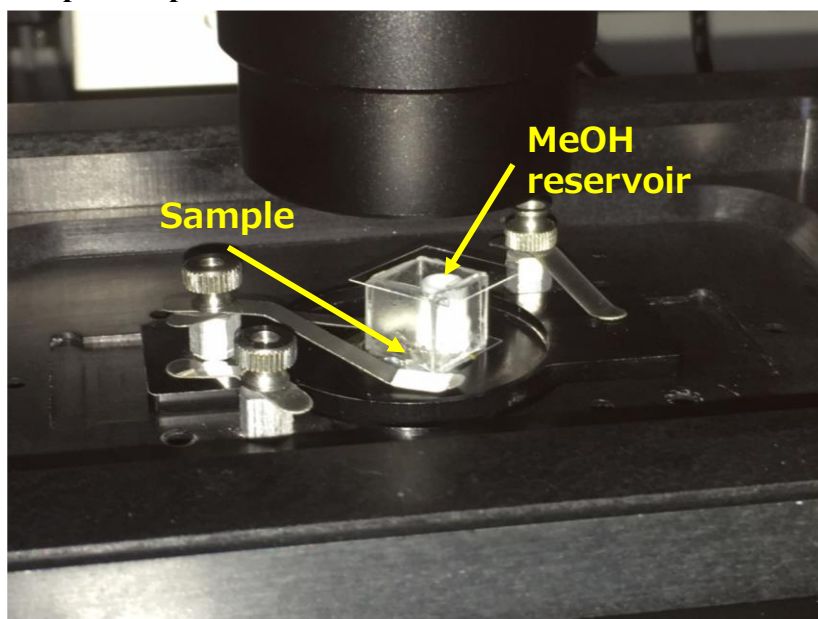

**Figure S1.** Experimental setup for vapochromic behaviors in a closed system ( $1\text{ cm} \times 1\text{ cm} \times 1.2\text{ cm}$ ). The sample was initially placed on a cover glass with a frame, followed by inserting 0.1 mL of MeOH into a reservoir in the frame. After sealing the system with a top cover, phosphorescence microscopy images were measured.

## Phosphorescence microscopy images

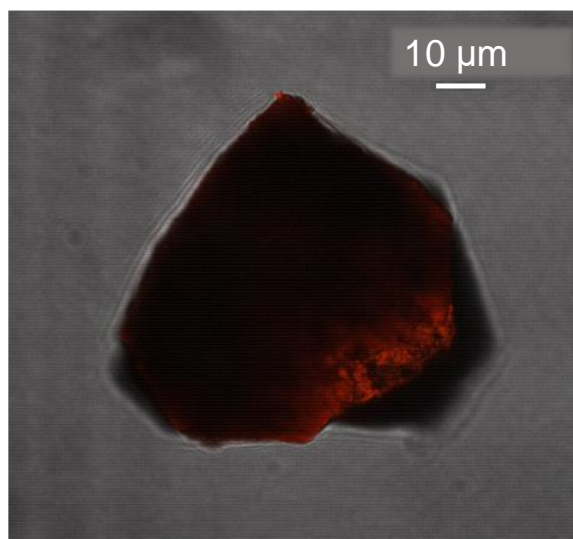

**Figure S2.** Confocal laser phosphorescence microscopy image (ex. 488 nm, em. 550-748 nm, 9.1 μm height) overlapped with a transmission light microscopy image for ~80 μm sized single  $[\text{Pt}(\text{CN})_2(\text{H}_2\text{dcbpy})]$  particle 30 min after MeOH vapor exposure. Movie S1 demonstrates the time evolution of the phosphorescence microscopy image (ex. 488 nm, em. 600-648 nm) of this single particle from 1 min to 31 min. For this larger single particle, the vapochromism is obviously initiated from the right side, i.e., the direction of the position of MeOH reservoir.

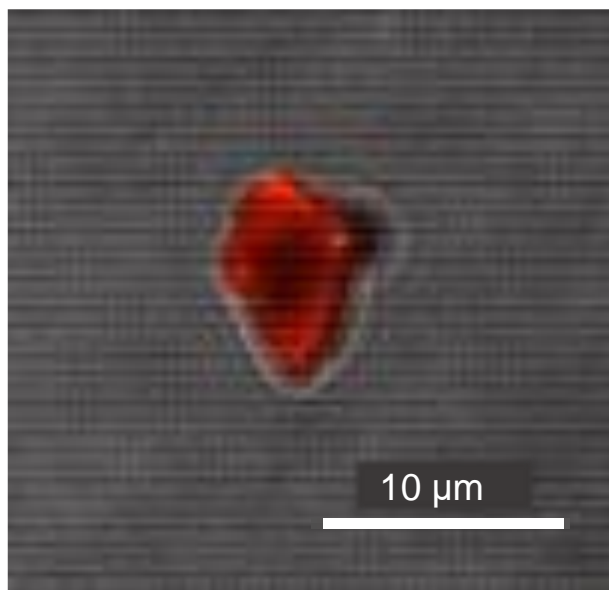

**Figure S3.** Confocal laser phosphorescence microscopy image (ex. 561 nm, em. 590-748 nm, 1.0 μm height) overlapped with a transmission light microscopy image for ~7 μm sized single  $[\text{Pt}(\text{CN})_2(\text{H}_2\text{dcbpy})]$  particle 30 min after MeOH vapor exposure. Movie S2 demonstrates the time evolution of the phosphorescence microscopy image (ex. 561 nm, em. 600-648 nm) for this single particle from 1 min to 31 min. For this smaller single particle, although the vapochromism was confirmed to have initiated from the surface, the difference between the right and left sides was negligible.

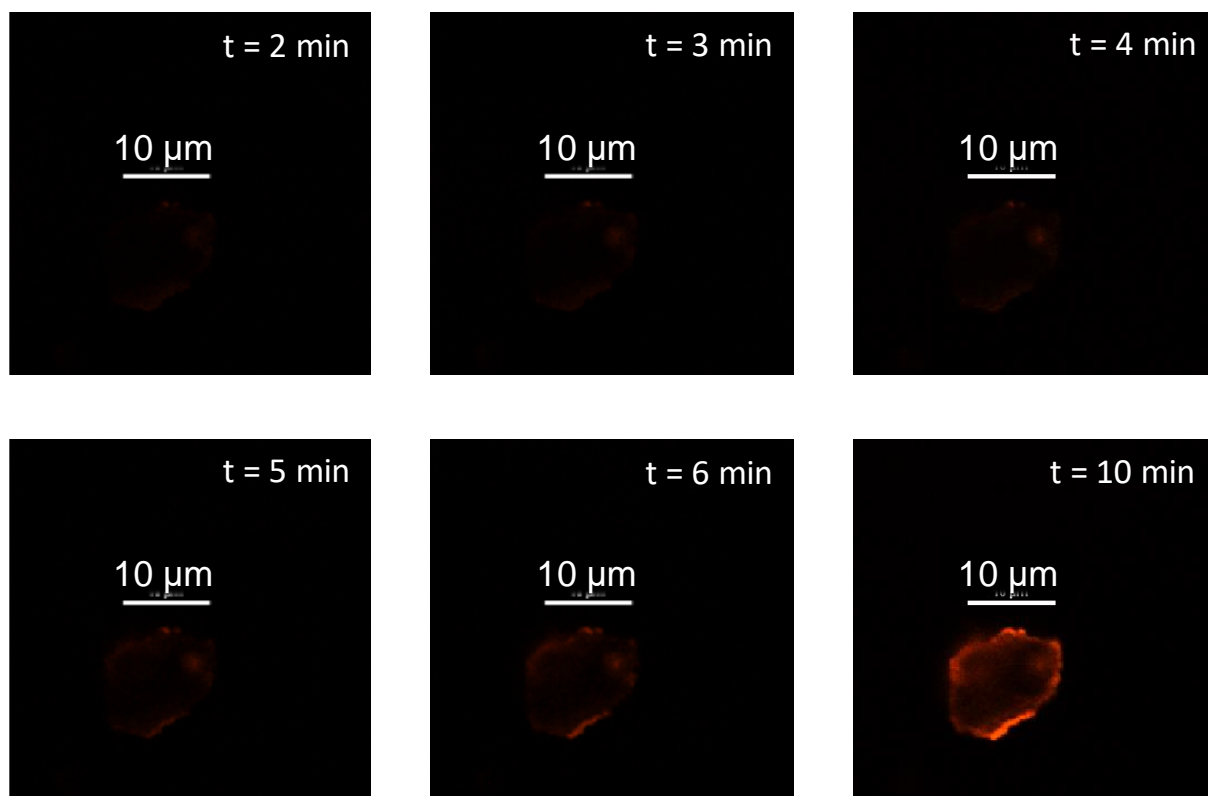

**Figure S4.** Time dependence of confocal laser phosphorescence microscopy images (ex. 561 nm, em. 600-649 nm, 2.4  $\mu\text{m}$  height) of 10  $\mu\text{m}$  sized single particle of  $[\text{Pt}(\text{CN})_2(\text{H}_2\text{dcbpy})]$  shown in Figure 3, after MeOH vapor exposure (2, 3, 4, 5, 6, 10 min later, respectively). For this single particle, the vapochromism initiated at 3 min from the right side, i.e., the direction of the position of the MeOH reservoir.
